# Supplementary material
Source: publisher site journal article supplement (https://www.dovepress.com/article/250614)
Supplement: Supplementary file 1 [file get_supplementary_file.php]

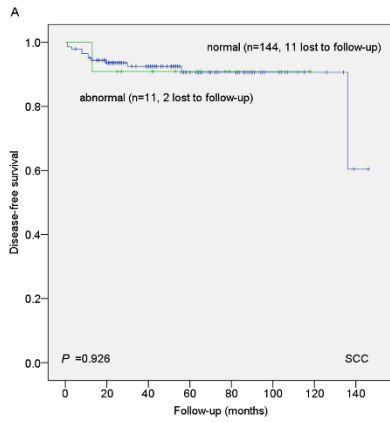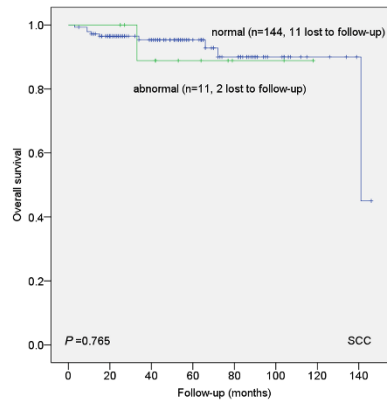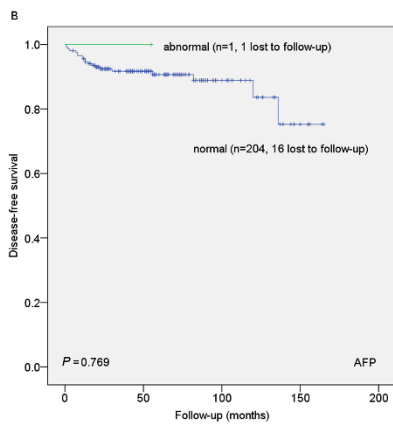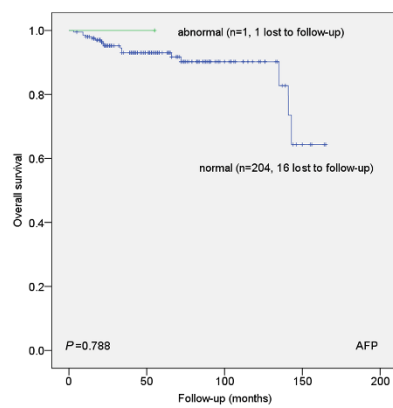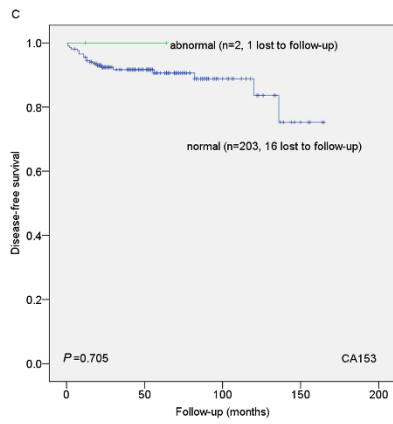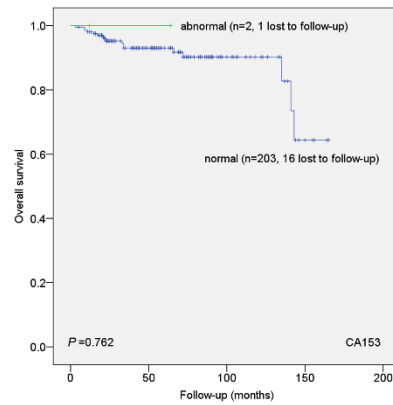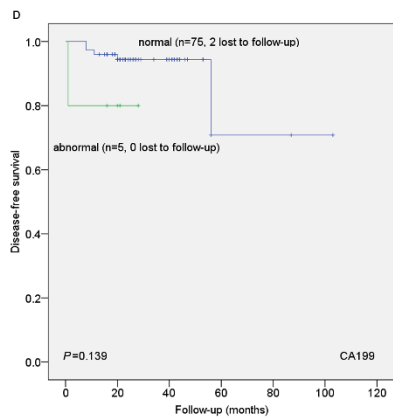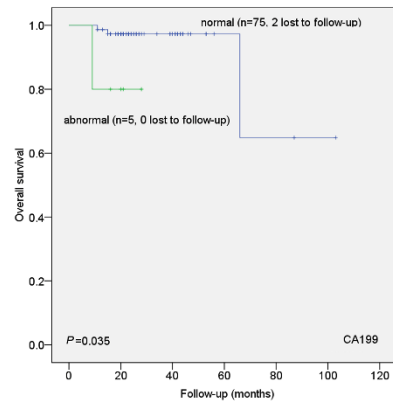

Supplementary Figure S1. Kaplan–Meier curves show the association of aberrant expression of SCC, AFP, CA153 and CA199 with patient disease-free survival (DFS) and overall survival (OS). The expression of SCC (A), AFP (B), CA153(C) and CA199(D) was not significantly associated with DFS or OS.

**Supplementary Tables S1** The Correlation between Expression of Tumor markers (SCC-Ag, AFP, CA153 and CA199) and Clinicopathological Characteristics in Patients with Early-stage Cervical Adenocarcinoma Characteristics.

|                        | SCC-Ag,n(%) |           | <i>P</i> | AFP,n(%) |           | <i>P</i> | CA153,n(%) |           | <i>P</i> | CA199,n(%) |          | <i>P</i> |
|------------------------|-------------|-----------|----------|----------|-----------|----------|------------|-----------|----------|------------|----------|----------|
|                        | abnormal    | normal    |          | abnormal | normal    |          | abnormal   | normal    |          | abnormal   | normal   |          |
| Patient age(year)      |             |           | 0.183    |          |           | 1.000    |            |           | 1.000    |            |          | 0.329    |
| <50                    | 10(6.5)     | 96(61.9)  |          | 1(0.5)   | 143(69.8) |          | 2(1.0)     | 142(69.3) |          | 2(2.5)     | 51(63.8) |          |
| ≥50                    | 1(0.6)      | 48(31.0)  |          | 0(0.0)   | 61(29.8)  |          | 0(0.0)     | 61(29.8)  |          | 3(3.8)     | 24(30.0) |          |
| FIGO stage             |             |           | 0.708    |          |           | 0.102    |            |           | 0.195    |            |          | 0.330    |
| I                      | 9(5.8)      | 130(83.9) |          | 0(0.0)   | 184(89.8) |          | 1(0.5)     | 183(89.3) |          | 4(5.0)     | 70(87.5) |          |
| II                     | 2(1.3)      | 14(9.0)   |          | 1(0.5)   | 20(9.8)   |          | 1(0.5)     | 20(9.8)   |          | 1(1.2)     | 5(6.2)   |          |
| BMI                    |             |           | 0.131    |          |           | 1.000    |            |           | 0.422    |            |          | 1.000    |
| ≤24.9                  | 6(3.9)      | 114(73.5) |          | 1(0.5)   | 155(75.6) |          | 1(0.5)     | 155(75.6) |          | 4(5.0)     | 61(76.2) |          |
| >24.9                  | 5(3.2)      | 30(19.4)  |          | 0(0.0)   | 49(23.9)  |          | 1(0.5)     | 48(23.4)  |          | 1(1.2)     | 14(17.5) |          |
| Menopause              |             |           | 1.000    |          |           | 0.137    |            |           | 1.000    |            |          | 0.497    |
| Yes                    | 1(0.6)      | 20(12.9)  |          | 1(0.5)   | 27(13.2)  |          | 0(0.0)     | 28(13.7)  |          | 1(1.2)     | 9(11.2)  |          |
| No                     | 10(6.5)     | 124(80.0) |          | 0(0.0)   | 177(86.3) |          | 2(1.0)     | 175(85.4) |          | 4(5.0)     | 66(82.5) |          |
| Differentiation        |             |           | 1.000    |          |           | 1.000    |            |           | 0.212    |            |          | 0.076    |
| Well/moderate          | 10(6.5)     | 130(83.9) |          | 1(0.5)   | 181(88.3) |          | 1(0.5)     | 181(88.3) |          | 3(3.8)     | 69(6.2)  |          |
| Poor                   | 1(0.6)      | 14(9.0)   |          | 0(0.0)   | 23(11.2)  |          | 1(0.5)     | 22(10.7)  |          | 2(2.5)     | 6(7.5)   |          |
| Tumor size(cm)         |             |           | 0.723    |          |           | 1.000    |            |           | 0.272    |            |          | 1.000    |
| <4                     | 8(5.2)      | 118(76.1) |          | 1(0.5)   | 174(84.9) |          | 1(0.5)     | 174(84.9) |          | 4(5.0)     | 60(75.0) |          |
| ≥4                     | 3(1.9)      | 26(16.8)  |          | 0(0.0)   | 30(14.6)  |          | 1(0.5)     | 29(14.1)  |          | 1(1.2)     | 15(18.8) |          |
| Myometrial invasion    |             |           | 1.000    |          |           | 0.273    |            |           | 0.074    |            |          | 0.019*   |
| <2/3                   | 8(5.2)      | 106(68.4) |          | 0(0.0)   | 149(72.7) |          | 0(0.0)     | 149(72.7) |          | 1(1.2)     | 57(71.2) |          |
| ≥2/3                   | 3(1.9)      | 38(24.5)  |          | 1(0.5)   | 55(26.8)  |          | 2(1.0)     | 54(26.3)  |          | 4(5.0)     | 18(22.5) |          |
| Vaginal wall extension |             |           | 0.532    |          |           | 0.059    |            |           | 1.000    |            |          | 0.001*   |
| No                     | 10(6.5)     | 135(87.1) |          | 0(0.0)   | 193(94.1) |          | 2(1.0)     | 191(93.2) |          | 2(2.5)     | 73(91.2) |          |
| Yes                    | 1(0.6)      | 9(5.8)    |          | 1(0.5)   | 11(5.4)   |          | 0(0.0)     | 12(5.9)   |          | 3(3.8)     | 2(2.5)   |          |
| Parametrial extension  |             |           | 1.000    |          |           | 0.020*   |            |           | 1.000    |            |          | 0.062    |
| No                     | 11(7.1)     | 140(90.3) |          | 0(0.0)   | 201(98.0) |          | 2(1.0)     | 199(97.1) |          | 4(5.0)     | 75(93.8) |          |
| Yes                    | 0(0.0)      | 4(2.6)    |          | 1(0.5)   | 3(1.5)    |          | 0(0.0)     | 4(2.0)    |          | 1(1.2)     | 0(0.0)   |          |
| Endometrial extension  |             |           | 1.000    |          |           | 0.054    |            |           | 1.000    |            |          | 0.009*   |
| No                     | 11(7.1)     | 138(89.0) |          | 0(0.0)   | 194(94.6) |          | 2(1.0)     | 192(93.7) |          | 3(3.8)     | 74(92.5) |          |
| Yes                    | 0(0.0)      | 6(3.9)    |          | 1(0.5)   | 10(4.9)   |          | 0(0.0)     | 11(5.4)   |          | 2(2.5)     | 1(1.2)   |          |
| LVSI                   |             |           | 0.232    |          |           | 0.073    |            |           | 0.141    |            |          | 1.000    |
| No                     | 9(5.8)      | 133(85.8) |          | 0(0.0)   | 190(92.7) |          | 1(0.5)     | 189(92.2) |          | 5(6.2)     | 70(87.5) |          |
| Yes                    | 2(1.3)      | 11(7.1)   |          | 1(0.5)   | 14(6.8)   |          | 1(0.5)     | 14(6.8)   |          | 0(0.0)     | 5(6.2)   |          |
| LNM                    |             |           | 0.708    |          |           | 0.102    |            |           | 0.195    |            |          | 0.095    |
| No                     | 9(5.8)      | 130(83.9) |          | 0(0.0)   | 184(89.8) |          | 1(0.5)     | 183(89.3) |          | 3(3.8)     | 68(85.0) |          |
| Yes                    | 2(1.3)      | 14(9.0)   |          | 1(0.5)   | 20(9.8)   |          | 1(0.5)     | 20(9.8)   |          | 2(2.5)     | 7(8.8)   |          |
| Surgical margin        |             |           | 1.000    |          |           | 1.000    |            |           | 1.000    |            |          | 0.122    |
| Clear                  | 11(7.1)     | 142(91.6) |          | 1(0.5)   | 202(98.5) |          | 2(1.0)     | 201(98.0) |          | 4(5.0)     | 74(92.5) |          |
| Involved               | 0(0.0)      | 2(1.3)    |          | 0(0.0)   | 2(1.0)    |          | 0(0.0)     | 2(1.0)    |          | 1(1.2)     | 1(1.2)   |          |

|                     |        |           |        |           |        |           |        |          |       |
|---------------------|--------|-----------|--------|-----------|--------|-----------|--------|----------|-------|
| Histological type   |        |           | 0.004* |           | 1.000  |           | 1.000  |          | 1.000 |
| Pure adenocarcinoma | 5(3.2) | 122(78.7) | 0(0.0) | 36(17.6)  | 0(0.0) | 36(17.6)  | 1(1.2) | 17(21.2) |       |
| Other               | 6(3.9) | 22(14.2)  | 1(0.5) | 168(82.0) | 2(1.0) | 167(81.5) | 4(5.0) | 58(72.5) |       |

**Note:** \*Significant differences ( $P < 0.05$ ) of the associations between prognostic value and disease-free and overall survival rates in patients with early-stage cervical adenocarcinoma.

**Abbreviation:** FIGO, International Federation of Gynecology and Obstetrics; BMI, body mass index; LVSI, lymph vascular space invasion; LNM, lymph node metastasis.
